# Supplementary material
Source: publisher figshare collection journal article supplement (https://acs.figshare.com/ndownloader/files/8326499)
Supplement: Supplementary file 1 [file 8326499]

## Supporting Information

**Title:** The effect of Ar/O<sub>2</sub> and H<sub>2</sub>O plasma treatment of SnO<sub>2</sub> nanoparticles and nanowires on carbon monoxide and benzene detection

**Authors:** Erin P. Stuckert, Christopher J. Miller, and Ellen R. Fisher\*

*Department of Chemistry, Colorado State University, Fort Collins, CO 80523-1872*

\* Corresponding Authors email address: [Ellen.Fisher@ColoState.Edu](mailto:Ellen.Fisher@ColoState.Edu)

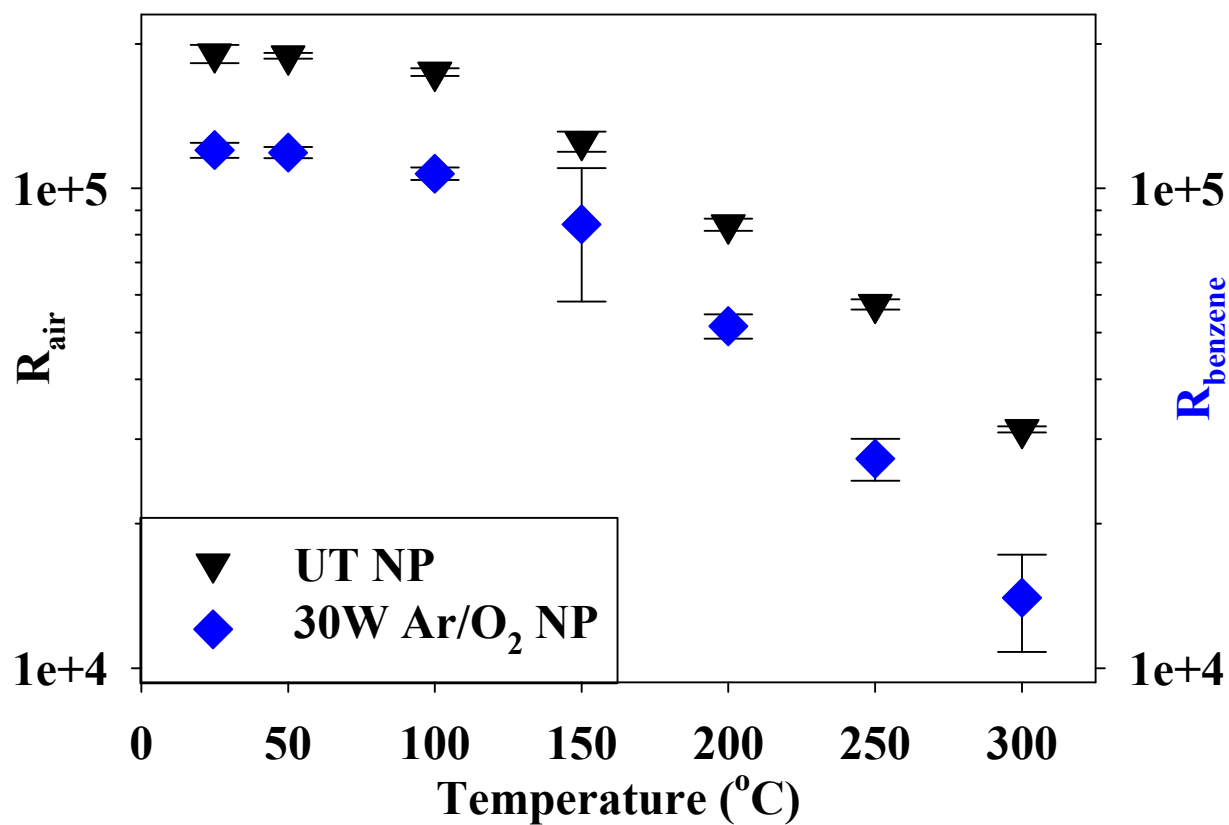

**Figure S1.** Sensor response as a function of temperature tested on two separate occasions. An untreated nanoparticle sensor was tested following our procedure once on each of two consecutive days (black triangles). A 30W Ar/O<sub>2</sub> NP sensor was tested once on two separate days months apart (blue diamonds).

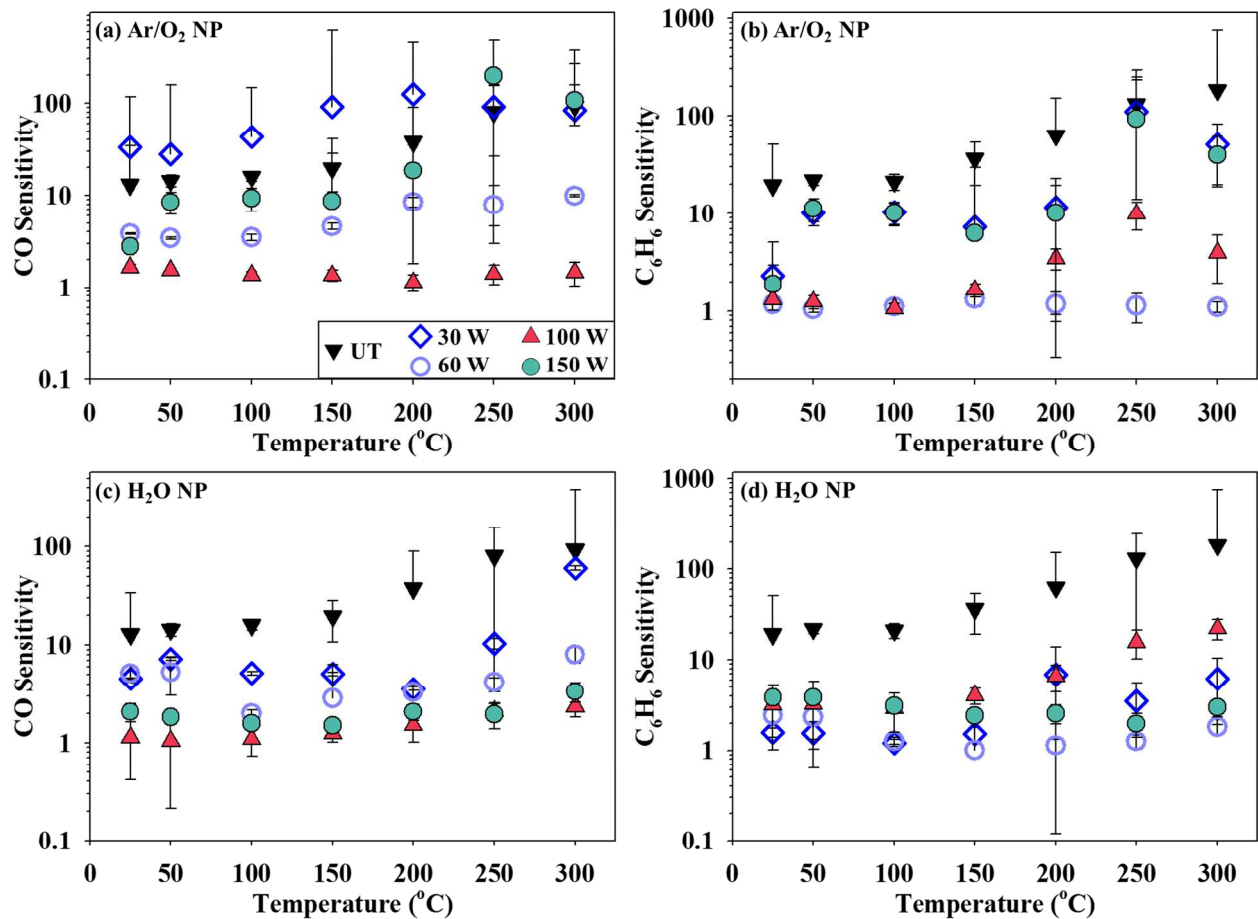

**Figure S2.** Gas sensor sensitivity for Ar/O<sub>2</sub> NP (a) in CO and (b) C<sub>6</sub>H<sub>6</sub>; and sensitivity for H<sub>2</sub>O NP (c) in CO and (d) C<sub>6</sub>H<sub>6</sub> as a function of  $T_s$  and  $P$ . Negative error not shown on plots are equivalent to positive error shown.

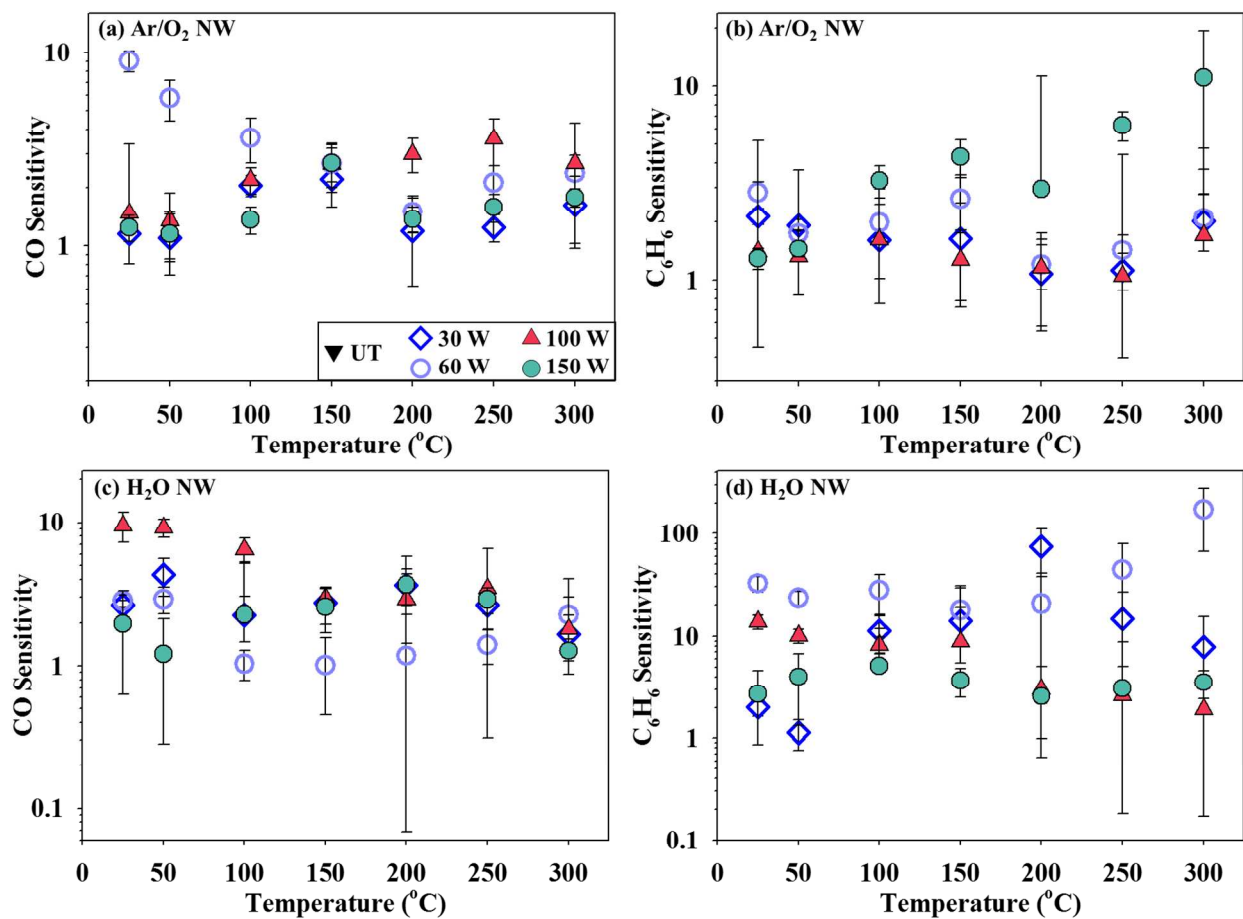

**Figure S3.** Gas sensor sensitivity for Ar/O<sub>2</sub> NW (a) in CO and (b) C<sub>6</sub>H<sub>6</sub>; and sensitivity for H<sub>2</sub>O NW (c) in CO and (d) C<sub>6</sub>H<sub>6</sub> as a function of  $T_s$  and  $P$ . Negative error not shown on plots are equivalent to positive error plotted.
